1 How Many Streamlines are Required for Reliable  
2 Probabilistic Tractography? Solutions for Microstructural  
3 Measurements and Neurosurgical Planning

4 Short Title

5 Calculating Required Streamline Counts for Probabilistic Tractography

6 Authors

7 Lee B. Reid <sup>1\*</sup>; Marcela I. Cespedes <sup>1</sup>, Kerstin Pannek <sup>1</sup>

8 <sup>1</sup> The Australian e-Health Research Centre, The Commonwealth Scientific and Industrial Research  
9 Organisation (CSIRO), Brisbane, Australia

10

11 \* Corresponding Author

12 *Email:* lee.reid@fastmail.com

13 *Address:* Level 5 UQ Health Science Building 901/16, Royal Brisbane and Women's Hospital, Herston,  
14 QLD 4029, Australia

15

## 16 **Abstract**

17 Diffusion MRI tractography is commonly used to delineate white matter tracts. These delineations can  
18 be used for planning neurosurgery or for identifying regions of interest from which microstructural  
19 measurements can be taken. Probabilistic tractography produces different delineations each time it  
20 is run, potentially leading to microstructural measurements or anatomical delineations that are not  
21 reproducible. Generating a sufficiently large number of streamlines is required to avoid this scenario,  
22 but what constitutes “sufficient” is difficult to assess and so streamline counts are typically chosen in  
23 an arbitrary or qualitative manner. This work explores several factors influencing tractography  
24 reliability and details two methods for estimating this reliability. The first method automatically  
25 estimates the number of streamlines required to achieve reliable microstructural measurements,  
26 whilst the second estimates the number of streamlines required to achieve a reliable binarised  
27 trackmap than can be used clinically. Using these methods, we calculated the number of streamlines  
28 required to achieve a range of quantitative reproducibility criteria for three anatomical tracts in 40  
29 Human Connectome Project datasets. Actual reproducibility was checked by repeatedly generating  
30 the tractograms with the calculated numbers of streamlines. We found that the required number of  
31 streamlines varied strongly by anatomical tract, image resolution, number of diffusion directions, the  
32 degree of reliability desired, the microstructural measurement of interest, and/or the specifics on how  
33 the tractogram was converted to a binary volume. The proposed methods consistently predicted  
34 streamline counts that achieved the target reproducibility. Implementations are made available to  
35 enable the scientific community to more-easily achieve reproducible tractography.

## 36 **Keywords**

37 diffusion weighted imaging; diffusion tractography; power analysis; streamline count; bootstrapping;  
38 reproducibility.

39

40

## 41 **1 Introduction**

42 Diffusion MRI measures the Brownian motion of water molecules in the brain, to which mathematical  
43 models can be applied to estimate the underlying orientation of white matter fibers. Tractography can  
44 then be applied to this model to delineate white matter pathways. Commonly, the scientific  
45 motivation for tractography is to sample microstructural measurements, such as fractional anisotropy  
46 (FA), of specific white matter tracts for the purpose of comparing populations or assessing changes  
47 over time (e.g. 1,2). An alternative motivation is to use the tractogram to guide neurosurgical planning  
48 or make morphological measurements (3,4). Probabilistic tractography is a popular means of  
49 performing these tasks but, unlike deterministic tractography, produces different delineations each  
50 time it is run. This presents an issue in both clinical and scientific contexts. If tractography is unreliable,  
51 microstructural measurements may be unreliable, potentially inflating Type I or Type II errors. More  
52 seriously, unreliable tractography in a clinical context might threaten patient safety (for example by  
53 underestimating the size of a tract, an issue also seen with deterministic tractography) or, at the very  
54 least, reduce the perceived usefulness of this tool for clinicians.

55 A major key to reliable probabilistic tractography is the number of streamlines generated. If  
56 two probabilistic tractograms are created with the same parameters, their streamline densities in  
57 corresponding voxels should converge as the number of streamlines increases. Extremely large  
58 numbers of streamlines, however, have high computational requirements to generate, view, and  
59 store. By contrast, whilst low streamline-count tractograms are less computationally expensive, even  
60 a cursory visual comparison against a higher streamline-count tractogram can demonstrate a failure  
61 to adequately delineate the desired anatomy (Figure 1). Some investigators have reported on the  
62 relationship between *whole-brain* streamline count and reproducibility in connectivity analyses (5–7),  
63 but for the anatomical delineation of specific tracts, little advice exists within the community for  
64 selecting a sensible number of streamlines. This is because the optimum number presumably relies  
65 on many factors, such as the head size, anatomy in question, sequence parameters, and image quality.  
66 Consequentially, the number of streamlines reported in published literature varies greatly, and  
67 authors rarely provide evidence that the streamline count chosen was sufficient to reliably delineate  
68 the anatomy in question.

69 A potentially compounding issue is that, in a neurosurgical context, the ideal means of  
70 interpreting tractography is not necessarily in its raw form but may be as a binarised trackmap (a track-  
71 density image (8) that has been thresholded then binarised). Several arguments exist for the  
72 conversion of probabilistic tractography into this format. For example, overlaying images with raw  
73 streamline files or non-binary voxelwise representations thereof is not well supported by Picture

74 Archiving and Communications System (PACS) oriented DICOM viewers that are central to clinical  
75 workflows (9,10). Clinicians are also generally more familiar with the more simplistic visualisations  
76 from deterministic diffusion tensor tractography that historically have dominated tractography  
77 research in surgical journals (for a review, see (11)). By contrast, viewing and interpreting probabilistic  
78 tractograms requires considerable experience, particularly with regards to judging the location of the  
79 true anatomical boundary, which can be obscured by false-positive streamlines, underestimated by  
80 obtaining too few streamlines, and modified by changing the depth of focus or transparency (Figures  
81 1 & 2). Binary maps, by contrast, leave little room for misinterpretation. Most importantly, tissue  
82 resection is itself a binary operation. Surgeons need to make binary decisions and so it is appropriate  
83 that risk boundaries are delineated as such, particularly when an intuitive mathematical basis for  
84 formalizing such boundaries is available. Of course, the act of thresholding and binarising trackmaps  
85 can compound the difficulty in choosing an optimal number of streamlines. This is not only because a  
86 range of thresholding rules can be used but more importantly, to the best of our knowledge, the  
87 impact of such thresholding on reproducibility has yet to be formally documented.

88         In this work we explore several factors influencing tractography reproducibility and propose  
89 two methods. The first automatically estimates the number of streamlines required to achieve reliable  
90 microstructural measurements, whilst the second estimates the number of streamlines required to  
91 achieve a reproducible binarised trackmap. Both methods can be applied either prospectively, to  
92 ensure adequate streamline numbers are generated, or retrospectively, to check historical results.  
93 Theoretically, these can be applied to any desired anatomy, diffusion dataset, diffusion model, or  
94 probabilistic tractography algorithm.

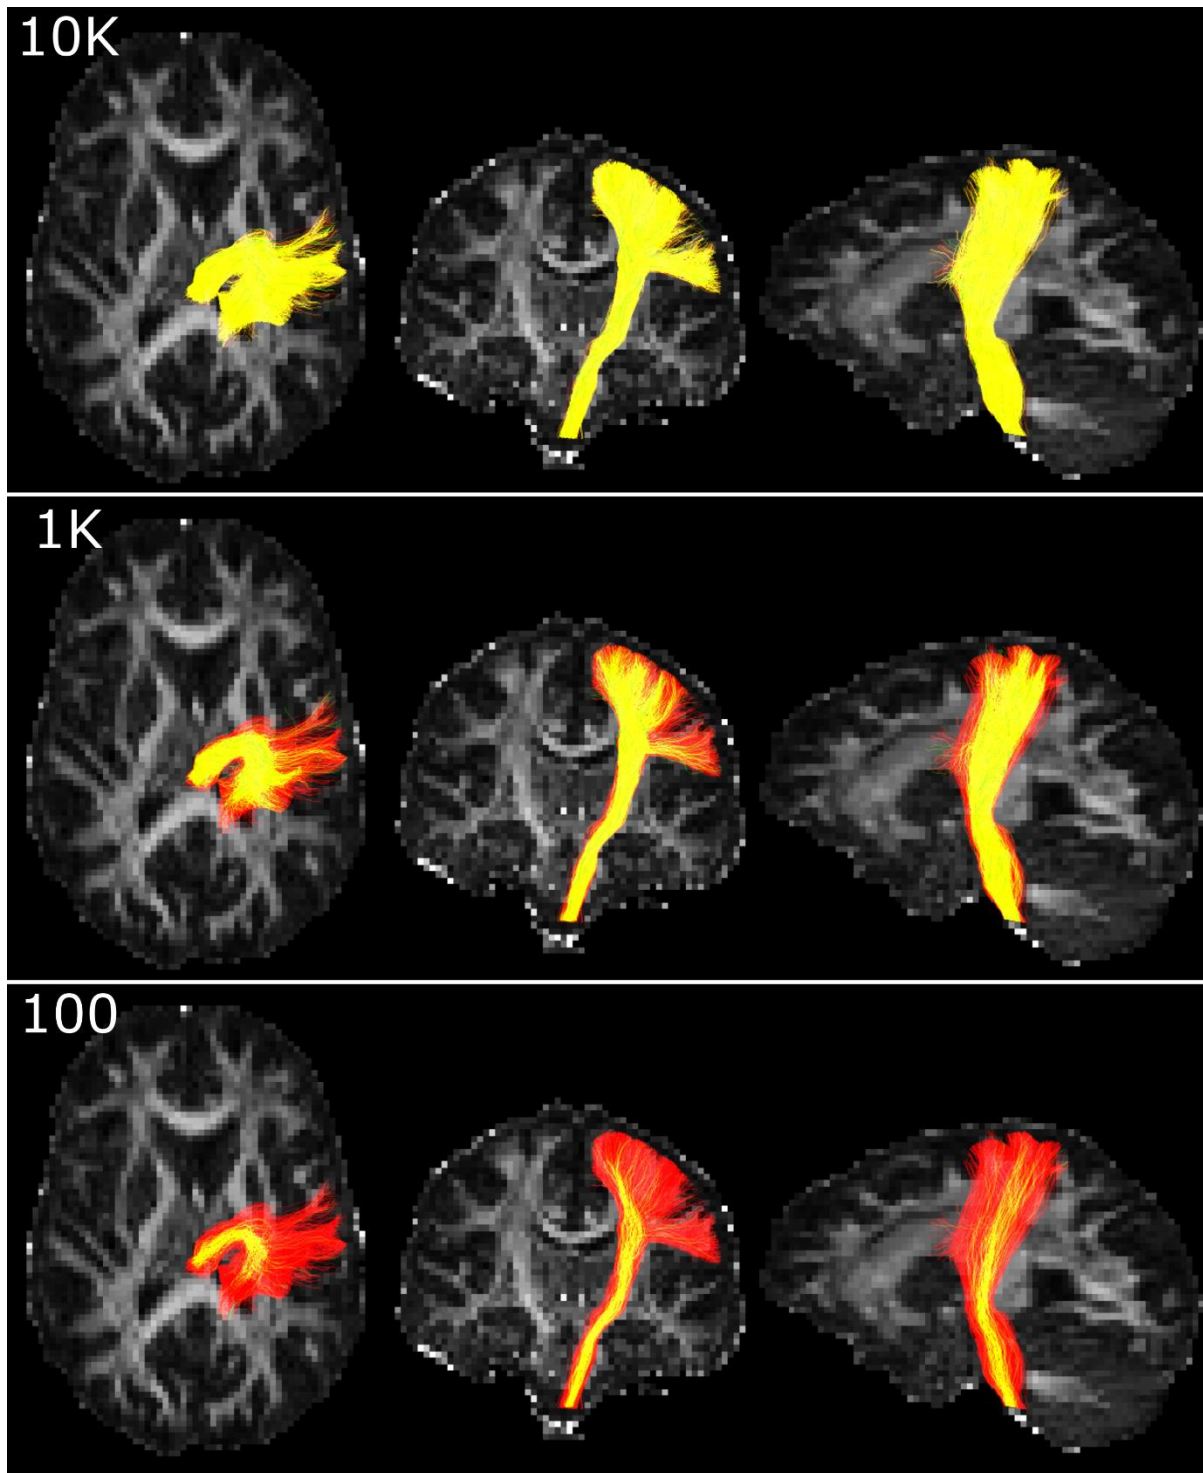

95

96 Figure 1. Tractograms of the corticospinal tract with 20,000 streamlines (red) overlaid with tractograms of 10,000  
97 streamlines (top), 1,000 streamlines (middle) and 100 streamlines (bottom). Yellow indicates overlap between the smaller  
98 and larger tractograms. The background image indicates fractional anisotropy. The 10,000 streamline tractogram  
99 predominantly overlaps the 20,000 streamline tractogram. By contrast, the smaller tractograms underestimate the extent  
100 of the corticospinal tract and suggest low confidence in its superior and anterior aspects that are reliably delineated by  
101 the larger tractogram. Data from Reid et al (12).

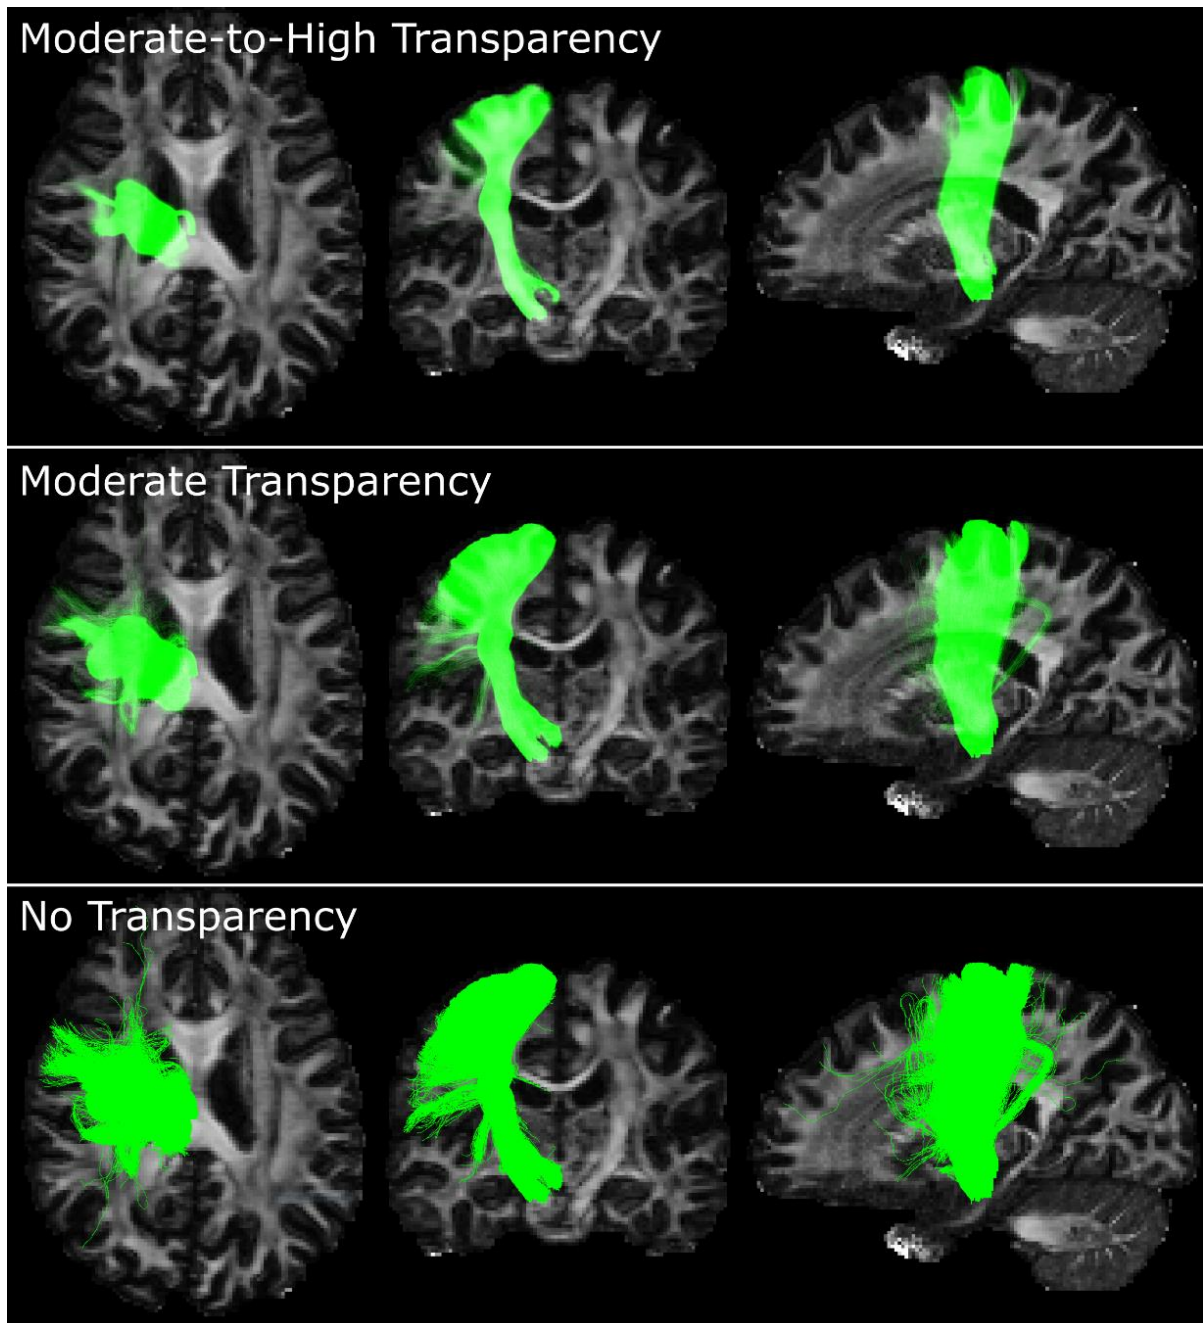

102

103 Figure 2. Altering transparency of streamlines can help to qualitatively judge the anatomical boundaries of a tract but  
104 requires considerable experience for use. A 100,000 streamline tractogram of the corticospinal tract is shown at moderate-  
105 to-high transparency (top row), moderate transparency (middle row) and without transparency (bottom row). Without  
106 transparency, the true boundaries are obfuscated by false-positive streamlines. With increasing transparency, the visual  
107 effect of these are reduced, but this also causes thinning of the central shaft and the disappearance of streamlines to the  
108 lateral pre-central gyrus.

## 109 2 Methods

110 We propose two metrics for determining the reliability of a tractogram. The first is a simple method  
111 that estimates the number of streamlines required to reliably sample a microstructural measure, such  
112 as FA or mean diffusivity (MD). The second is a more complex method we term *Tractogram*

113 *Bootstrapping* which estimates the number of streamlines required to generate a binarised trackmap  
114 that has a known margin of error in terms of voxels included and excluded. Both methods were tested  
115 for three tracts: the corticospinal tract, the forceps major, and the long segment of the arcuate  
116 fasciculus. Implementations of both methods can be downloaded from  
117 <https://bitbucket.csiro.au/projects/CONSULT/repos/tractography-reliability/>. Symbols are defined in  
118 Table 1.

119 **Table 1. Abbreviated terms used to describe approaches proposed in this work.**

---

|                      |                                                                                                                                                                                                                                   |
|----------------------|-----------------------------------------------------------------------------------------------------------------------------------------------------------------------------------------------------------------------------------|
| AF                   | Long segment of the arcuate fasciculus                                                                                                                                                                                            |
| CST 1.25             | Corticospinal tract delineated at 1.25mm resolution                                                                                                                                                                               |
| CST 2                | Corticospinal tract delineated at 2mm resolution                                                                                                                                                                                  |
| $D$                  | Dice coefficient                                                                                                                                                                                                                  |
| $D_{0.05}(n_{samp})$ | 5 <sup>th</sup> percentile of Dice coefficients for tractograms containing $n_{samp}$ streamlines                                                                                                                                 |
| $D_t$                | The target Dice coefficient. If the given tract was generated twice using identical parameters, and both converted to binary trackmaps, we desire a 95% chance that the Dice coefficient between these two maps is at least $D_t$ |
| HCP                  | Human Connectome Project                                                                                                                                                                                                          |
| FA                   | Fractional Anisotropy                                                                                                                                                                                                             |
| FM                   | Forceps Major                                                                                                                                                                                                                     |
| MD                   | Mean Diffusivity                                                                                                                                                                                                                  |
| $n_{req}$            | The number of unique streamlines required to achieve the target reproducibility                                                                                                                                                   |
| $n_{tract}$          | The number of unique streamlines currently generated                                                                                                                                                                              |
| $n_{samp}$           | The number of streamlines sampled from the unique set. This value may be greater than $n_{tract}$ if such sampling allows duplicates                                                                                              |
| ROI                  | Region of interest                                                                                                                                                                                                                |
| $t_{bin}$            | Binarisation threshold                                                                                                                                                                                                            |
| TB                   | Tractography bootstrapping                                                                                                                                                                                                        |
| $W$                  | Desired width of the 95% confidence interval                                                                                                                                                                                      |

---

## 120 **2.1 Diffusion Metric Reliability Estimation**

121 It is common to use a tractogram to sample from an image containing microstructural information,  
122 such as FA. One common method to achieve this is to take the value from the image at each streamline  
123 vertex (stepping coordinate), average these into a single value per streamline, and take the mean of  
124 these streamlines values to get a final average. Generating and utilising tractograms in this way is  
125 arguably a complex form of sampling, and so the more streamlines are acquired, the more reliable  
126 (though not necessarily accurate) the tractogram diffusion metric will be. As this is an average-of-  
127 averages with a large number of data points, it can be expected to generate normally distributed  
128 values, in accordance with the Central Limit Theorem (13). Thus, if a partially-complete tractogram is  
129 available, the number of streamlines required to achieve a desired margin of error can be calculated  
130 using the standard power analysis calculation (14):

$$n_{req} = \frac{3.92^2 \sigma^2}{W^2} \quad (1)$$

131 where  $n_{req}$  is the number of required streamlines,  $\sigma$  is the standard deviation of values sampled from  
132 a target image using the partially generated tractogram (e.g. FA values), and  $W$  is the desired width  
133 of the 95% confidence interval.

134 We prospectively calculated the required number of streamlines to achieve a microstructural  
135 measurement of known reliability ( $W$ ). This process is described below and summarized in Figure 3;  
136 refer to Table 1 for abbreviations. First, one thousand streamlines were generated, followed by  
137 sampling of the microstructural image. From this sample,  $n_{req}$  was derived using Equation (1). If the  
138 number of streamlines currently generated ( $n_{tract}$ ) was greater than  $n_{req}$ , the process exited. If not,  
139 additional streamlines were generated and appended to the tractogram. The number of additional  
140 streamlines was chosen to be  $n_{req} - n_{tract}$ , but constrained to the range of 1,000 to 5,000. The  
141 process then returned to the estimation of  $n_{req}$ . The minimum (1,000) and maximum (5,000) step  
142 sizes used here were not strictly required, but solely used to improve the efficiency of streamline  
143 generation due to the large number of tractograms generated for this study. Specifically, the  
144 maximum step size reduced the risk of generating more streamlines than required. This often occurs  
145 during earlier iterations in which the algorithm overestimates  $n_{req}$ , thus generating more streamlines  
146 than necessary. The minimum step size, by contrast, aimed to reduce the overhead of excessively  
147 stopping and starting tractography, which can occur during later iterations when small step sizes are  
148 used.

149 We note that there are two alternative sampling methods. The first is to average  
150 microstructural values vertex-wise, rather than streamline-wise. This method can be used with the  
151 current procedure by providing vertex-wise (rather than streamline-wise) diffusion metrics to the  
152 proposed algorithm, and dividing the resulting  $n_{req}$  by the mean number of vertices per streamline.  
153 The second approach is to convert a tractogram into a trackmap, binarise this, and take the average  
154 microstructural value within this region of interest (ROI). For this second approach, we refer readers  
155 to Tractogram Bootstrapping (described below), which calculates the number of streamlines required  
156 to achieve a stable binarised trackmap.



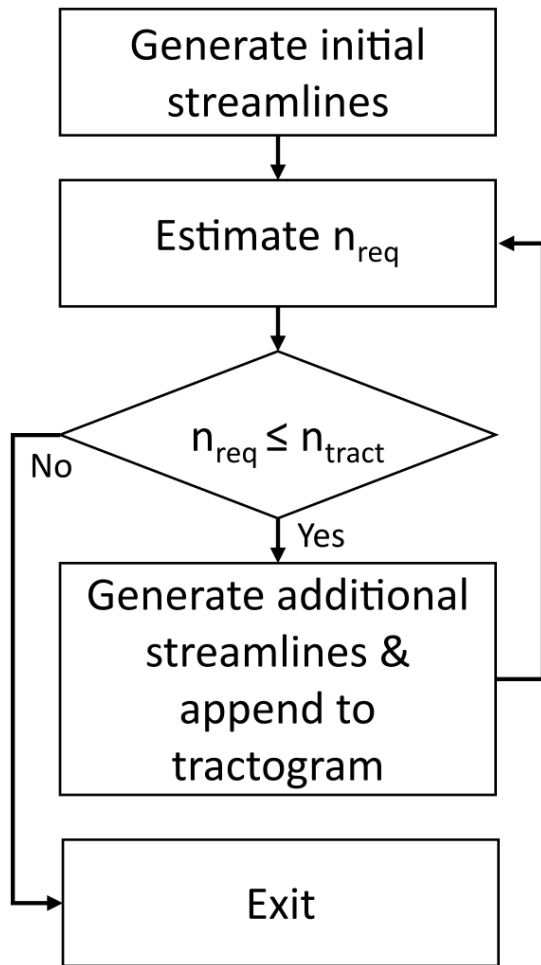

157

158 **Figure 3. Method to estimate the required number of streamlines to achieve reliable tractography prospectively**  
159 **(applicable to both proposed algorithms). See text for details. Abbreviations:  $n_{req}$ , the number of streamlines required to**  
160 **achieve target reproducibility;  $n_{tract}$ , the number of streamlines currently generated.**

## 161 **2.2 Tractogram Bootstrapping**

162 Tractogram Bootstrapping (TB) was created for improving the reliability of morphological  
163 measurements, particularly with neurosurgical planning in mind. Such planning typically delineates a  
164 binary mask describing a region to be avoided for safety reasons. This safety region may be  
165 automatically generated using tractography (i.e. a binarised trackmap in the case of probabilistic  
166 tractography). As this ROI is binary, its quality can be summarized using the Dice coefficient (15),  
167 similar to traditional tissue segmentation problems. Unlike performance estimates of such traditional  
168 problems, however, the ground truth is not available, meaning that quantitative assessments of this  
169 tractography-defined region must focus on reliability rather than accuracy. Reflecting this, TB reports  
170 the number of streamlines to achieve a 95% chance that, if tracking were performed twice with  
171 identical parameters on the same data, the Dice coefficient between the two binarised trackmaps  
172 would be at least a user-defined target value ( $D_t$ ). For example, if  $D_t$  is set to 0.9, TB would estimate

173 the number of streamlines required such that, if tractography were performed twice, the two  
174 tractograms would have a 95% chance of a Dice coefficient of at least 0.9.

175 In addition to  $D_t$ , TB requires two parameters that describe how binary trackmaps are  
176 generated: the trackmap voxel size, and a binarisation threshold ( $t_{bin}$ ) expressed as a fraction of the  
177 number of streamlines contributing to the map ( $n_{samp}$ ). The binarisation threshold is used to reject  
178 voxels passed through by very few streamlines. For example, a binarisation threshold of 0.001 would  
179 mean that a voxel must contain  $0.001 \times n_{samp}$  streamlines in order to be included in the binary map.

180 Tractogram bootstrapping contains four major steps: sampling, similarity estimation, 5<sup>th</sup>  
181 percentile calculation, and required streamline count estimation. These steps are summarized in  
182 Figure 4 and explained in detail below. Consider a tractogram with  $n_{tract}$  streamlines. Twenty values  
183 of  $n_{samp}$  are selected, evenly spaced from 100 to  $\max\{n_{tract}, 10/t_{bin}\}$ . These lower and upper  
184 bounds were selected because initial testing suggested that failure to do so could result in  
185 overestimations of tracking reliability (see thresholding effects in Results). Sampling, similarity  
186 estimation, and 5<sup>th</sup> percentile calculation steps are performed for each value of  $n_{samp}$ , estimating  
187 reproducibility for a range of streamline counts. The final step combines these results to calculate the  
188 required streamline count ( $n_{req}$ ) for a desired level of reproducibility ( $D_t$ ).

### 189 2.2.1 Sampling

190 A tractogram containing  $n_{samp}$  streamlines is generated. For each value of  $n_{samp}$ , streamlines are  
191 sampled randomly from the tractogram to generate 100 pairs of  $n_{samp}$ -streamline tractograms  
192 (Figure 4A). Two sampling methods are used, depending on the value of  $n_{samp}$ . When  $n_{samp} \leq$   
193  $0.5 \times n_{tract}$ , streamlines are sampled *without* replacement (i.e. so that within a pair, no streamline  
194 appears twice). When  $n_{samp}$  is larger, sampling with replacement (i.e. bootstrapped sampling) is  
195 performed, enabling larger samples but carrying the drawback that a given pair of tractograms may  
196 contain duplicate streamlines both within and between one another; this drawback is further  
197 described below. This combination of sampling methods was used because initial testing suggested  
198 that such an approach generally allowed  $n_{req}$  to be estimated more accurately than sampling without  
199 replacement alone when fewer than  $\sim 2 \times n_{req}$  streamlines had been generated.

### 200 2.2.2 Similarity Estimation

201 Each tractogram is converted into a trackmap that is thresholded at  $t_{bin} \times n_{samp}$  and binarised (Figure  
202 4B). For each pair of tractograms, the Dice coefficient of the two trackmaps ( $D$ ) is then calculated  
203 (Figure 4C).

### 204 2.2.3 Fifth Percentile Calculation

205 Once 100 Dice coefficients have been calculated for a particular  $n_{samp}$ , the 5th percentile of this  
206 metric, denoted here as  $D_{0.05}(n_{samp})$ , is calculated (Figure 4D).  $D_{0.05}(n_{samp})$  is an estimation of  
207 expected reproducibility of future tractography generation for a particular streamline count.  
208 Specifically, if we were to generate two new tractograms, each containing  $n_{samp}$  streamlines, we have  
209 an approximately 95% chance that the Dice coefficient between these would be at least  $D_{0.05}(n_{samp})$ .

210 Unlike sampling without replacement, bootstrapping is prone to inflation of Dice coefficients,  
211 and thus  $D_{0.05}$  estimates. Such bias can be calculated by performing both bootstrapping and sampling-  
212 without-replacement where possible. This knowledge can be used to correct bias where only  
213 bootstrapping is possible. Due to metric discontinuities induced by thresholding (see Results),  
214 however, this is only possible for very few values of  $n_{samp}$ , and sometimes not at all. In the interest  
215 of brevity, we refer interested readers to Supplementary Materials for an explanation of how this  
216 correction was performed.

### 217 2.2.4 Required Streamline Count Estimation

218 The final step (Figure 4E) is performed once all  $D_{0.05}(n_{samp})$  values have been calculated. To predict  
219 the number of streamlines required to meet criteria  $D_t$  (i.e. the minimum  $n_{samp}$  such that  
220  $D_{0.05}(n_{samp}) \geq D_t$ ), the relationship between  $D_{0.05}$  and  $n_{samp}$  can be described by a traditional  
221 four-parameter logistic curve whose inflection point is fixed at one streamline and remaining  
222 parameters  $a$ ,  $b$  and  $d$  are estimated using the Levenberg-Marquardt technique:

$$\hat{a}, \hat{b}, \hat{d} = \arg \min_{a,b,d} \left\{ \sum_{i=0}^{20} \left( D_{0.05,i}(n_{samp,i}) - d - \frac{a-d}{a + (n_{samp,i})^b} \right)^2 \right\} \quad (2)$$

223 The number of streamlines required to achieve the user-specified confidence criteria  $D_t$  can then be  
224 estimated from the inequality below for the streamline number:

$$n_{req} \geq \left( \frac{D_t - \hat{a}}{\hat{d} - D_t} \right)^{1/\hat{b}} \quad (3)$$

225 Note that during development simpler alternatives to Equation 2 were explored but demonstrated  
226 substantially poorer fits to data.

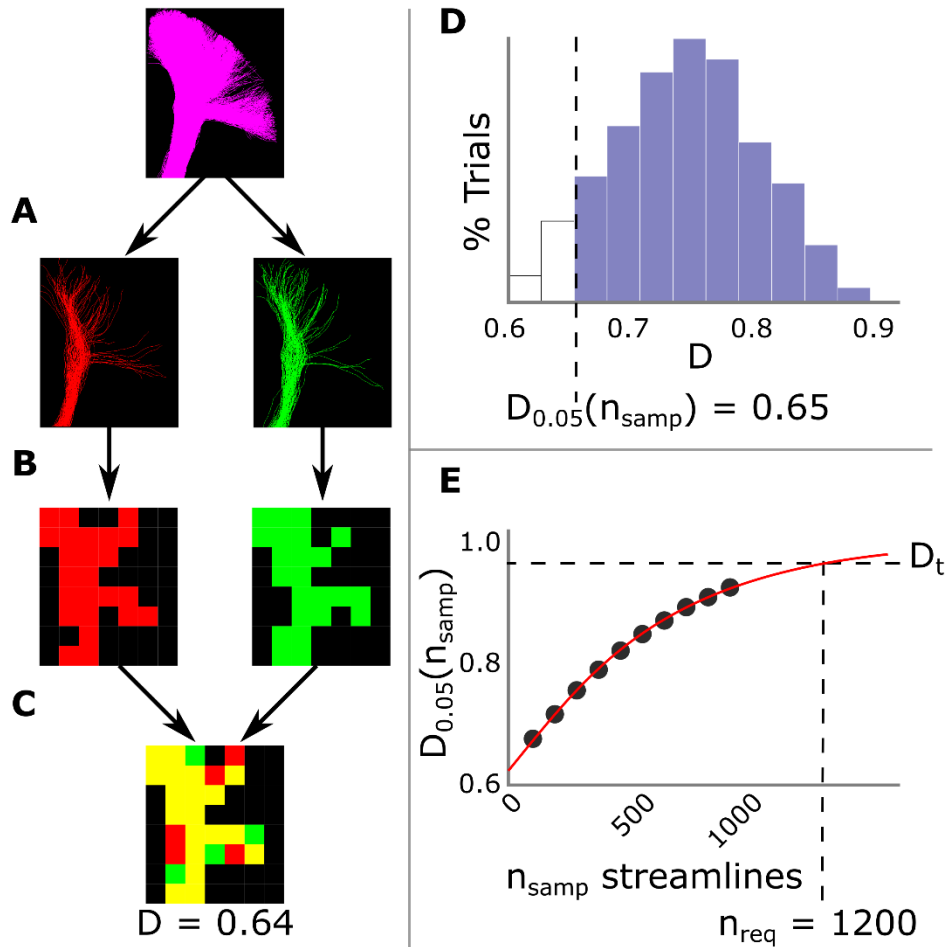

227

228 Figure 4. Steps performed during TB. Steps A-D are performed for each value of  $n_{samp}$ . A – C: Sampling and Similarity  
 229 Estimation (see text). D: Steps A – C are repeated 100 times, estimating Dice coefficients 100 times, shown here as a  
 230 histogram. The 5<sup>th</sup> percentile ( $D_{0.05}(n_{samp})$ ) is then calculated. E: The relationship between  $n_{samp}$  and  $D_{0.05}(n_{samp})$  is  
 231 modelled via a logistic regression (red line), allowing calculation of the number of required streamlines ( $n_{req}$ ) to achieve  
 232 a user specified degree of reliability ( $D_t$ ). Abbreviations:  $D$ , the Dice coefficient;  $D_{0.05}(n_{samp})$ , the 5<sup>th</sup> percentile of Dice  
 233 coefficients for tractograms containing  $n_{samp}$  streamlines;  $n_{req}$ , the number of streamlines required to achieve target  
 234 reproducibility;  $n_{samp}$ , the number of streamlines sampled from the tractogram.

## 235 2.3 Comparison with Cross Validation

236 Cross validation was used to assess the ability of the two proposed algorithms to estimate  $n_{req}$  for a  
 237 range of reliability criteria and white matter tracts. We utilized the first 40 ‘minimally pre-processed’  
 238 diffusion datasets from the Human Connectome Project (HCP) Young Adult dataset (1200 Subjects  
 239 Release) (16). For each dataset, during tracking we prospectively estimated the number of streamlines  
 240 required to meet the criteria in question, using the previously described methods and the process  
 241 shown in Figure 3. For each dataset and criterion, we then generated an additional 100 tractograms  
 242 each containing the predicted number of required streamlines. These 100 additional tractograms were  
 243 compared to one another (in terms of diffusion metrics or similarity) to ascertain the *actual* reliability  
 244 of this tractography.

### 245 2.3.1 Image Processing

246 Diffusion images were used in their ‘minimally preprocessed’ state, as provided in the HCP 1200  
247 Subjects Data Release (unique directions: 90 @ 1000 s/mm<sup>2</sup>, 90 @ 2000 s/mm<sup>2</sup>, and 90 @ 3000 s/mm<sup>2</sup>,  
248 plus 18 @ b=0 s/mm<sup>2</sup>). This minimal preprocessing included correction for b<sub>0</sub> intensity  
249 inhomogeneities, EPI distortion, eddy currents, head motion, gradient non-linearities, as well as  
250 reorientation and resampling to 1.25mm isotropic (17). Each diffusion scan contributed to three  
251 datasets: a high-resolution multishell dataset containing unaltered images; a ‘downsampled  
252 multishell’ dataset generated by downsampling preprocessed images to 2mm isotropic; and a single-  
253 shell dataset generated by removing all but 50 volumes from the downsampled multishell dataset (5  
254 @ b=0 s/mm<sup>2</sup>; 45 @ b=1000 s/mm<sup>2</sup>, selected to be approximately evenly distributed on the sphere  
255 using code provided in the aforementioned git repository). The single-shell dataset consisted of the  
256 b=1000 s/mm<sup>2</sup> shell so that the tensor images would be maximally similar between the three datasets,  
257 as these were calculated from this shell in all instances. Fiber orientation distribution images were  
258 generated using MRtrix3’s (18) multi-shell multi-tissue constrained spherical deconvolution method  
259 (multishell data) or Single-Shell 3-Tissue constrained spherical deconvolution (single-shell dataset;  
260 <https://3Tissue.github.io>), in conjunction with the Dhollander algorithm to estimate the tissue  
261 response functions (19,20).

262 We generated tractograms of the right corticospinal tract for all three datasets to observe the  
263 effects of spatial and angular resolution. To also observe the effects of anatomy, we also generated  
264 tractograms for the long segment of the right arcuate fasciculus and the forceps major using the  
265 multishell downsampled dataset. The multishell downsampled dataset was chosen for this task to  
266 reduce computational overhead and to test the proposed algorithms at a resolution more typically  
267 seen in current literature.

268 High resolution (0.7 mm isotropic) structural T1 MPRAGE images were denoised using Global  
269 Approximate Block Matching (21). The registration between the T1 and diffusion data set was ensured  
270 by performing a rigid registration between the T1 and first b=0 image of the series, using ANTS. ANTS  
271 SyN (22) was then used to calculate the non-rigid registration between the result and the MNI ICBM  
272 152 template (23) to enable the later transfer of ROIs from MNI space into diffusion space.

### 273 2.3.2 Tractography

274 For tractography we used MRtrix3’s iFOD2 algorithm (24). Unless specified, ROIs were those defined  
275 by the Freesurfer-based parcellation provided in the HCP dataset. Other described ROIs are supplied  
276 as figures in Supplementary Materials.

277           The right corticospinal tract was seeded from the grey matter / white matter boundary of the  
278 right precentral gyrus to the brainstem mask. The corpus callosum mask was dilated by one voxel (18-  
279 connected) and used as an exclusion mask.

280           The long segment of the arcuate fasciculus was seeded from grey matter / white matter  
281 boundary found within the pars opercularis. The grey matter / white matter boundary of the superior  
282 temporal lobe posterior to MNI  $y = 14.5mm$  acted as an inclusion mask. Manually delineated  
283 exclusion and inclusion masks (Supplementary Figures 4 – 6), designed to reduce anatomically  
284 implausible streamlines, were moved from MNI space into diffusion space. The aforementioned  
285 dilated corpus callosum mask formed a second exclusion mask.

286           The forceps major was tracked both from left-to-right (50% of streamlines), and from right-  
287 to-left, the results of which were combined to form a final tractogram. Seed or inclusion masks in each  
288 hemisphere consisted of the lateral occipital lobe, cuneus and pericalcarine fissure. The splenium was  
289 an additional inclusion mask in both cases. An exclusion mask (Supplementary Figure 7), manually  
290 delineated on the MNI template and moved into each subject's diffusion space, reduced anatomically  
291 implausible streamlines.

### 292 2.3.3 Cross Validation

293 To test the tractography metric reliability method, the following was performed for each type of tract,  
294 in each subject, targeting standard deviations of 0.001 for FA measurements and  $10^{-6}$  for MD  
295 measurements. Initially, a tractogram was generated using the methodology summarized in Figure 3.  
296 To ensure a fair assessment of this algorithm, if this method generated more than  $n_{req}$  streamlines  
297 (i.e. overshoot due to the minimum number generated on each iteration), streamlines were removed  
298 such that the streamline count was  $n_{req}$ . A further 100 tractograms were then generated in the  
299 normal manner, each with  $n_{req}$  streamlines. The mean FA or MD measurement was taken from each  
300 of these 100 tractograms using MRtrix3 and the standard deviation for each subject was compared  
301 with the specified stopping criteria.

302           Tractogram bootstrapping was tested for the same anatomical tracts for a range of confidence  
303 parameters, listed in Table 2. We note that Conditions A1 and A2 are too lenient for neurosurgical  
304 applications and were only used here to explore the robustness of the proposed algorithm. A  
305 tractogram was generated using the process described earlier, until the stopping criterion was met,  
306 and the streamline count restricted to  $n_{req}$  in the case of an overshoot. One hundred additional  
307 tractograms with  $n_{req}$  streamline counts were then generated, converted into binary trackmaps, and  
308 paired into 50 sets of two. For each pair, the Dice coefficient was calculated in the way previously

309 described. The 5<sup>th</sup> percentiles of these proportions were then recorded and compared with the  
310 appropriate  $D_t$  value.

311 **Table 2. Parameters for the conditions tested. Track-map resolution matched the diffusion image resolution (1.25mm or**  
312 **2mm isotropic). Abbreviations:  $D_t$ , target dice coefficient;  $t_{bin}$ , binarisation threshold.**

313

| Condition | $D_t$ | $t_{bin}$ |
|-----------|-------|-----------|
| A1        | 0.9   | 0.01      |
| B1        | 0.95  | 0.01      |
| C1        | 0.97  | 0.01      |
| A2        | 0.9   | 0.001     |
| B2        | 0.95  | 0.001     |
| C2        | 0.97  | 0.001     |

314

315

## 316 **3 Results**

### 317 **3.1 Tractography Metric Reliability Estimation**

318 The number of streamlines required for reliable microstructural measurements varied considerably  
319 by type of microstructural measurement (i.e. FA or MD), anatomical tract, and dataset (Figure 5, top  
320 panel). Of particular note, the number of streamlines required to achieve reliable MD measurements  
321 varied by over two orders of magnitude, depending on the anatomical tract and dataset in question  
322 (arcuate fasciculus minimum, 107; forceps major maximum, 30100). At these  $n_{req}$  values, cross  
323 validation demonstrated actual standard deviations similar to target values for FA and MD in all  
324 anatomical tracts targeted (Figure 5, middle panel). These standard deviations did not differ between  
325 the five tracking conditions (one-way ANOVAs; both with  $p > 0.4$ ). When we purposefully selected  
326 fewer than  $n_{req}$  streamlines, standard deviations were larger than target values (Figure 5, bottom  
327 panel).



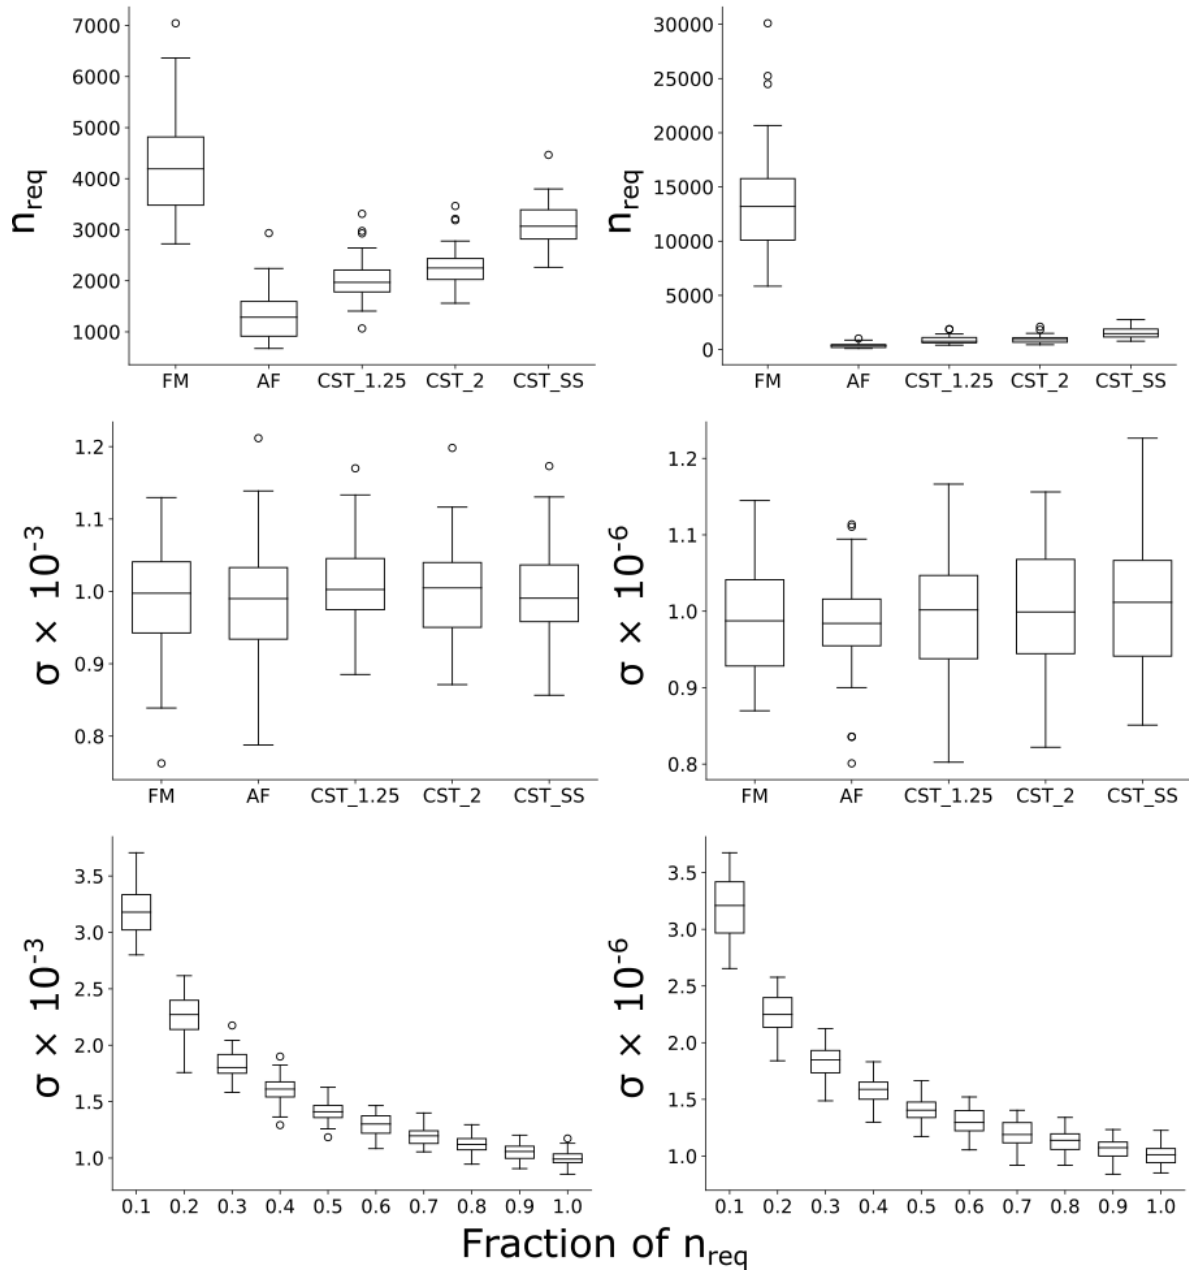

328

329 **Figure 5. Number of streamlines required and errors in achieving target standard deviations of  $10^{-3}$  (FA, left column) and**  
 330  **$10^{-6}$  (MD, right column). Each participant contributed a single datapoint to each box in each plot. Top: Predicted number**  
 331 **of streamlines required to achieve target reliabilities. The number of required streamlines varied strongly depending on**  
 332 **the anatomy and microstructural measure in question. Middle: The actual standard deviations at  $n_{req}$ , as calculated by**  
 333 **cross-validation. In all instances, actual standard deviations were close to that of the target values. Bottom: The actual**  
 334 **standard deviations at fractions of  $n_{req}$ , as calculated by cross-validation, pooled across all participants and anatomical**  
 335 **tracts. Abbreviations: AF, arcuate fasciculus; CST 1.25, corticospinal tract at 1.25mm resolution; CST 2, corticospinal tract**  
 336 **at 2mm resolution; CST SS corticospinal tract at 2mm resolution with single shell data; FM, forceps major;  $n_{req}$ , the**  
 337 **number of streamlines required to achieve target reproducibility.**

## 338 **3.2 Tractogram Bootstrapping**

### 339 **3.2.1 General Observations**

340 Regardless as to the anatomy in question, when binarisation was performed without thresholding, the  
341 volumes of the resulting trackmaps increased in a logarithmic manner (Figure 6). When thresholding  
342 was applied as a function of streamline count, these volumes reached a plateau if sufficient  
343 streamlines were generated. However, this trend demonstrated discontinuities when this threshold  
344 reached the next integer (e.g. at 1000, 2000, 3000 streamlines), the influence of such discontinuities  
345 diminishing as streamline count increased. In some instances, this meant that when binarised  
346 trackmaps were generated from fewer streamlines, their volumes would be higher than when  
347 generated with much larger numbers of streamlines (Figure 6, Figure 7). We also experimented with  
348 an alternative strategy (4), where the threshold was set at 1% of the maximum trackmap intensity.  
349 This method showed the same behavior, with the additional drawback that the streamline counts at  
350 which these discontinuities would occur was not easily predictable, varying by dataset and tract type.

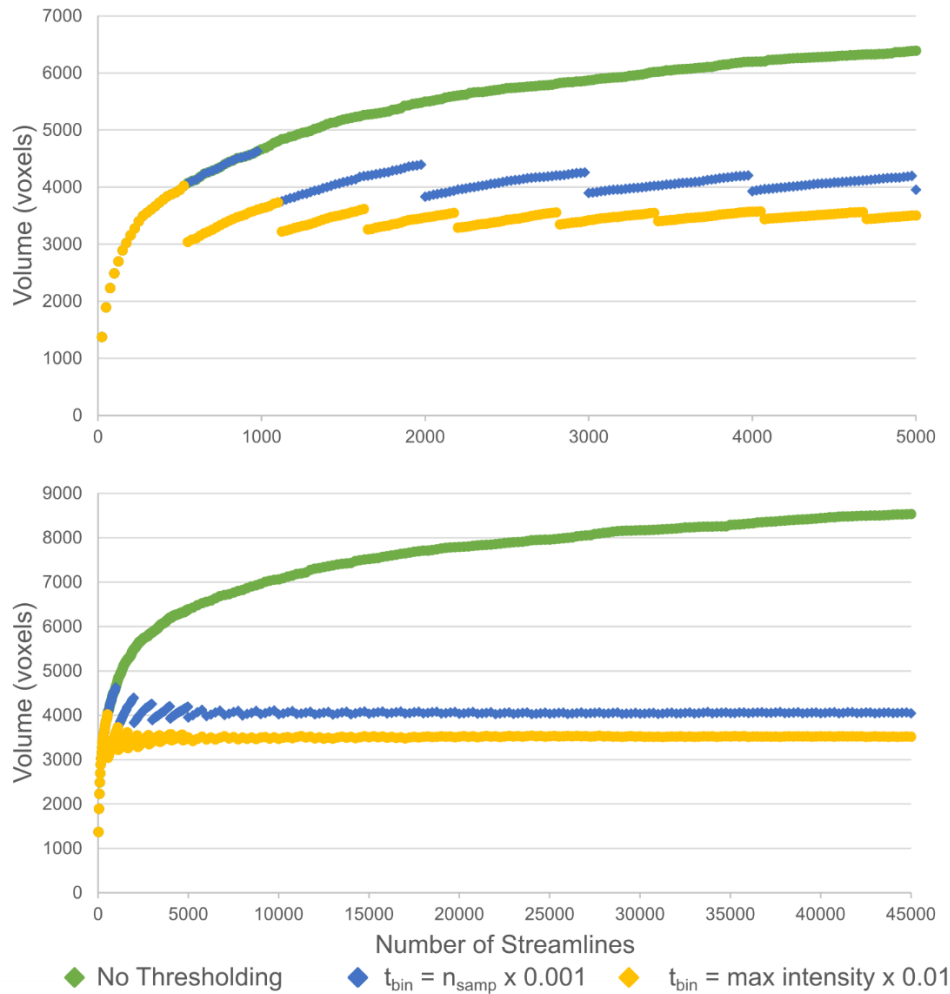

352 **Figure 6. Relationship between binarised trackmap volume and number of streamlines. Upper and lower graphs are the**  
353 **same data shown at two different x-axis ranges. These data were generated by tracking the forceps major of an HCP**  
354 **participant included in the current study. The three lines represent the binarised trackmap volume when not thresholding**  
355 **(green, top), thresholding at 0.001 x streamline count (blue, central), and at 0.01 x the maximum trackmap intensity (gold,**  
356 **bottom). Abbreviations:  $n_{samp}$ , the number of streamlines sampled from the tractogram;  $t_{bin}$ , the binarisation threshold.**

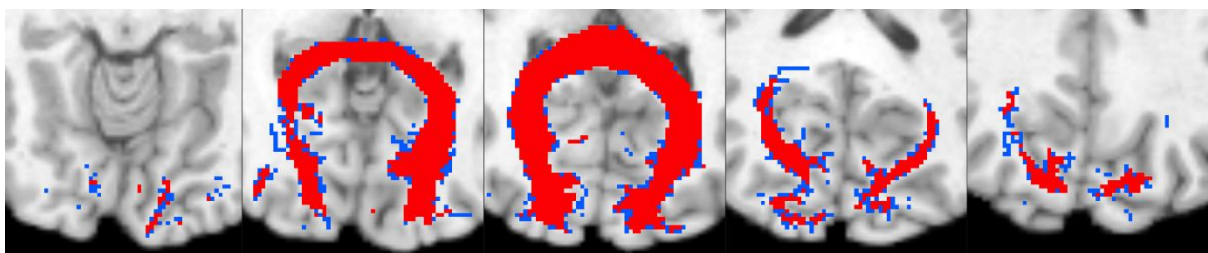

357

358 **Figure 7. Five axial slices of a forceps major trackmap, thresholded at 0.001 x the streamline count and binarised. Blue and**  
359 **red together indicate the binary map when 999 streamlines are available. Red alone shows the binary map when an**  
360 **additional two streamlines were added to this tractogram and thresholding was performed using the same rule. Notice**  
361 **the high number of voxels removed (blue) due to this minute increase in streamline number raising the threshold to the**  
362 **next integer value.**

### 363 3.2.2 Predictive Performance

364 The predicted number of streamlines differed substantially depending on the dataset, anatomy to  
365 delineate, and target reproducibility (Figure 8, Left). To meet the reproducibility criteria at a resolution

366 of 2mm with multishell data, the number of required streamlines ( $n_{req}$ ) ranged from 593 (Condition  
367 A2; arcuate fasciculus) to 16738 (Condition C2; forceps major). The number of streamlines required  
368 to delineate the corticospinal tract was also substantially higher at a resolution of 1.25mm than at  
369 2mm, but higher still for the 2mm resolution single-shell dataset.

370 The actual Dice coefficient at  $n_{req}$ , as assessed by cross validation, differed by less than 0.01  
371 from target values ( $D_t$ ) across conditions B1, B2, C1, and C2 in 99% of all tests (Figure 8, Right). Such  
372 absolute error was below 0.01 in 90% of cases for conditions A1 and A2. When purposefully selecting  
373 fewer than  $n_{req}$  streamlines, Dice coefficients were lower than  $D_t$  for all tracts and conditions (Figure  
374 9, Supplementary Materials S3).

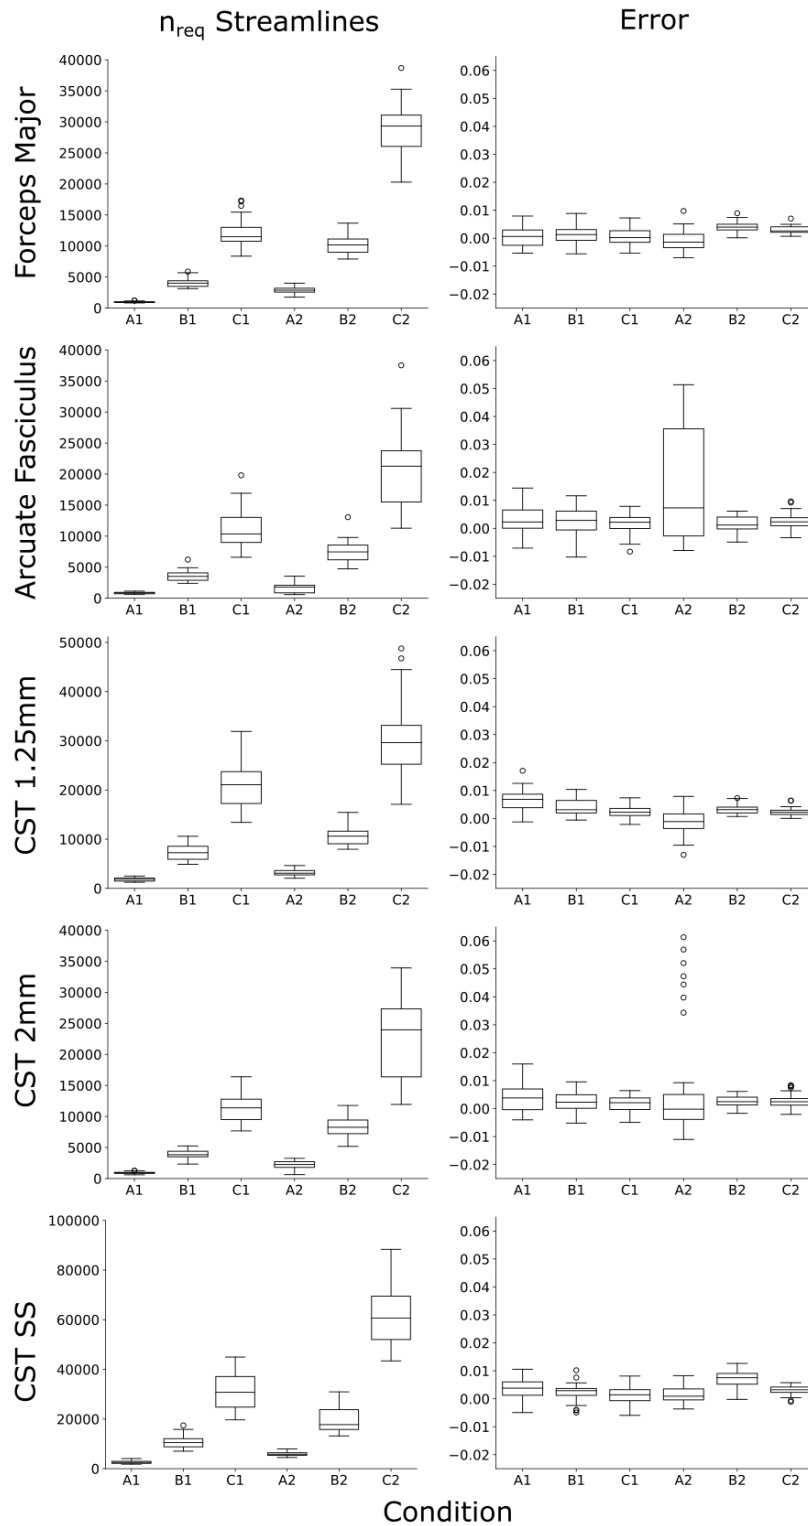

375

376 **Figure 8. Left: The required number of streamlines ( $n_{req}$ ), as calculated by tractogram bootstrapping for different anatomy**  
 377 **and reproducibility criteria. Note the CST conditions have different y-axis ranges. Note how  $n_{req}$  differs clearly by the**  
 378 **anatomy, reproducibility condition, spatial resolution and angular resolution. Right: the amount of error, expressed as**  
 379  **$D_t - D_{actual}$ , where these actual values were assessed by cross validation using  $n_{req}$  streamlines. In most circumstances,**  
 380 **actual error was within 1% of that desired. Both arcuate fasciculus and forceps major delineations were at a 2mm isotropic**  
 381 **resolution. Each participant contributed a single datapoint to each box in each plot. Abbreviations: CST 1.25, corticospinal**  
 382 **tract at 1.25mm resolution; CST 2, corticospinal tract at 2mm resolution; CST SS corticospinal tract at 2mm resolution with**  
 383 **single shell data; A1, A2, B1, B2, C1, C2: conditions tested, as defined in Table 2;  $D_t$  the target Dice coefficient;  $D_{actual}$ , the**  
 384 **actual dice coefficient.**

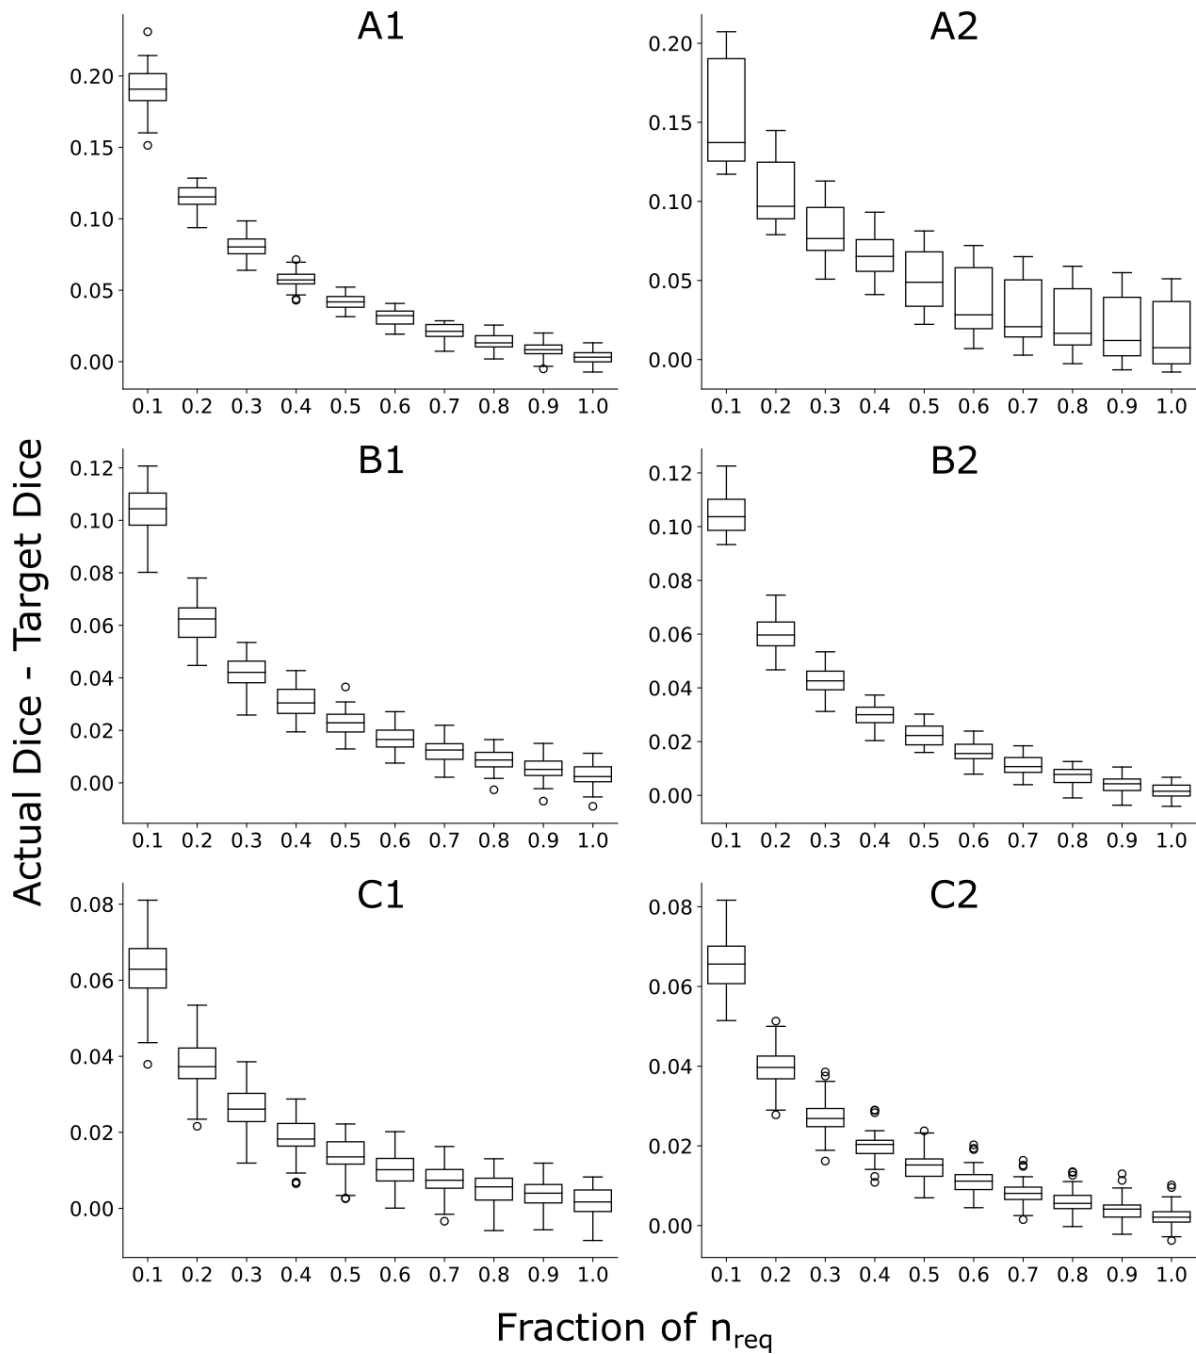

385

386 **Figure 9 Relationship between streamline number, normalized to  $n_{req}$ , and tractography reliability of the arcuate**  
387 **fasciculus. The y-axis indicates the actual Dice coefficient ( $D_{actual}$ ) minus the target Dice coefficient ( $D_t$ ). Each**  
388 **participant contributed one datapoint to each box, in each plot. A1, A2, B1, B2, C1, and C2 refer to different stopping**  
389 **criteria, defined in Table 2. Error progressively reduced as more streamlines were added, reaching approximately zero**  
390 **for most stopping criteria when  $n_{req}$  streamlines had been generated. Relationships for other anatomical tracts were**  
391 **similar and can be found in Supplementary Materials.**

392

## 393 **4 Discussion**

394 Tractography is utilized in both clinical and scientific contexts for the purposes of taking morphological  
395 and microstructural measurements. In both contexts, generating a sufficiently high number of  
396 streamlines is critical to ensuring that such measurements are reproducible. Tractography can be a  
397 computationally expensive process in terms of generation, viewing, and storage. Choosing a practical  
398 number of streamlines is not a simple task, because the relationship between streamline count and  
399 reproducibility is likely to depend on a great number of patient and image-related factors. Here, we  
400 proposed two methods designed to automatically calculate the number of streamlines needed for  
401 reliable tractography in an individual dataset. Both methods can be performed prospectively. A major  
402 benefit to this approach is that it can both prevent inflation of Type I and II errors due to insufficient  
403 streamline generation, as well as avoid excessive streamline generation that can be computationally  
404 expensive.

405 We demonstrated how standard statistics can be utilized to estimate how many streamlines  
406 are required to achieve reliable microstructural measurements, such as FA or MD. When used  
407 prospectively, this approach reliably generated tractograms that gave FA or MD measurements with  
408 true margins of error close to the targeted margin of error (Figure 5). Vastly different numbers of  
409 streamlines were required for different anatomical tracts and microstructural measures (Figure 5).  
410 Presumably, such differences were due to different tract types having different delineation  
411 reliabilities, as seen in our experiments on trackmap reliability, as well as different distributions of  
412 microstructural values throughout their volume (e.g. differing proportions of voxels containing  
413 crossing fibers or partial volume effects with ventricular CSF). In the past, it has been common to base  
414 streamline counts on qualitative assessments (such as the appearance of a test tract) or default  
415 software values, rather than by considering the microstructural measures which are intended to be  
416 sampled. In the present study, the large difference between required numbers of streamlines for FA  
417 and MD in the forceps major highlights that such an approach is unlikely to fairly assess how many  
418 streamlines are required for reliable measurements. The number of required streamlines in several  
419 test cases here also demonstrated that streamline counts in the low thousands, sometimes considered  
420 to be sensible or even excessive, might be inappropriate for some datasets and hypotheses. Given the  
421 variability demonstrated, we wish to make clear that it is not appropriate to utilize the estimates  
422 reported here to choose streamlines counts in other datasets. Rather, we encourage readers to apply  
423 the methods provided here to their own datasets to ensure that adequate reliability is obtained.

424 Following this analysis, we turned our focus to the generation of binary trackmaps – ROIs  
425 generated from probabilistic tractography that can be more suited to some neurosurgical settings. An

426 important finding is that the method by which a tractogram is binarised can markedly affect the  
427 volume of the resulting map. Specifically, if thresholding is not performed before binarisation then  
428 tract volume grows until virtually the entire brain is filled (Figure 6). The implications of this are that,  
429 when tractography is used to estimate the safety of a surgical procedure, failure to apply a threshold  
430 can result in an unreasonably large estimate of risk, potentially resulting in surgical intervention being  
431 wrongly altered or rejected over safety concerns. By contrast, voxelwise thresholding allows tract  
432 volumes to reach a plateau. However, thresholding causes discontinuities in volume at multiples of  
433 the inverse of the binarisation threshold ( $1/t_{bin}$ ; Figure 6), which appear to be particularly strong for  
434 the first and second multiples of this threshold, but decrease in amplitude with increasing numbers of  
435 streamlines. To avoid this issue, based solely on the data seen here, we caution against selecting a  
436 streamline count below four times the inverse of the binarisation threshold used. We also  
437 experimented with an alternative binarisation approach based on the maximum trackmap intensity,  
438 but this demonstrated the same problem and had an additional drawback in that predicting where  
439 discontinuities would occur would be difficult or impossible before tracking takes place. We do note  
440 that non-integer trackmaps are possible in MRtrix3 (25), which might avoid the existence of  
441 discontinuities, but caution their use on the basis that the interpretation of these trackmap values is  
442 not straightforward. Specifically, these ‘precise’ trackmaps allow each streamline to contribute values  
443 greater than one to each voxel when it passes through a voxel non-perpendicularly. This means that  
444 the resulting map no longer reflects streamline count passing through a region in a straightforward  
445 way: for example, higher values can be expected in areas of curvature or where streamlines travel at  
446 an angle relative to the voxel orientation. This makes the choice of a threshold less intuitive than the  
447 simpler mapping used here.

448 To achieve a reliable map, the number of required streamlines estimated by TB differed  
449 substantially depending on the participant, anatomy to delineate, binarisation threshold, spatial  
450 resolution, angular resolution, and target reproducibility (Figure 8). For realistic parameters (B1, B2,  
451 C1, and C2), these estimations appear to have been accurate: when cross validation was performed  
452 for  $n_{req}$  streamlines, 99% of cases resulted in actual  $D_{0.05}$  values within 0.01 of  $D_t$ . For criteria A1 and  
453 A2, this success rate was somewhat lower, potentially because the number of streamlines required  
454 was often below 100, which is the bottom limit at which the algorithm explicitly estimates  $D_t$ . We  
455 emphasise again that criteria as lax as A1 and A2 should not be used, but were merely tested here to  
456 evaluate performance of tractogram bootstrapping under a range of input parameters.

457 We note that the present method is purposefully designed for a limited scope of applications;  
458 in other situations it may be appropriate to extend this work or to use more appropriate previously



459 published methods. For example, the present work is targeted towards identifying, or measuring  
460 metrics from singular tracts. For whole-brain based analyses, a more sophisticated tool such as SIFT2  
461 (26) is likely to be more appropriate to ensure streamline counts are comparable across the brain's  
462 physical network. However, SIFT2 is not appropriate for single-tract analyses, as it relies on contextual  
463 information supplied by other tracts and cannot currently estimate the number of streamlines  
464 required to achieve reliable microstructural measurements. One potential extension of our method is  
465 to estimate  $n_{req}$  for non-binarised trackmaps. To achieve this, it is a relatively trivial exercise to avoid  
466 binarisation and replace  $D_t$  in the current implementation with an image similarity metric, such as a  
467 normalised sum of absolute differences. Although beyond the intended scope of the current work,  
468 our initial informal testing with this appears to show relatively robust results. Such metrics, however,  
469 are neither particularly interpretable nor intuitive, meaning that choosing appropriate stop criteria is  
470 potentially no less arbitrary than selecting a streamline count directly. We note that coefficient of  
471 variation is an intuitive metric that has been previously used to compare trackmaps (6) but, in our  
472 experience, can behave erratically when 'stray' streamlines are generated.

473 Finally, we reiterate that the proposed methods are solely designed to reduce variability  
474 caused by insufficient streamline counts. That is, the proposed methods do not guarantee that such  
475 tractography is accurate, simply that the streamline generation command itself provides reproducible  
476 outputs when applied to the same scan repeatedly. An interesting extension to the present work  
477 would be assessing to what extent additional factors affect the scan-rescan reproducibility of  
478 tractography and associated microstructural measurements. Some answers and solutions to issues,  
479 however, may be complex as such reproducibility is likely to depend on a wide range of currently non-  
480 standardised and interacting factors including the MR sequence, preprocessing steps, anatomy  
481 investigated, type and presence of pathology, ROI placement method, streamline generation  
482 algorithm and even gradient non-linearities of the scanner in question (27).

483 In conclusion, we have presented two methods. The first automatically estimates how many  
484 streamlines are required to achieve reliable microstructural measurements, whilst the second  
485 estimates how many streamlines are required to achieve a reliable binarised trackmap. When we  
486 repeatedly generated tractograms, each containing the estimated number of streamlines, we found  
487 microstructural measurements and resultant trackmaps had levels of reproducibility closely aligned  
488 to that targeted. We hope that by making these tools available  
489 (<https://bitbucket.csiro.au/projects/CONSULT/repos/tractography-reliability/>), researchers can more  
490 easily select the appropriate number of streamlines for their application, removing the need to rely  
491 on rules of thumb or the qualitative appearance of resultant tractograms.

## 492 **Acknowledgements**

493 The authors are grateful to Ashley Gillman for his help in preparation of this manuscript.

## 494 **Funding**

495 Lee Reid is funded through an Advance Queensland Research Fellowship (R-09964-01).

496 Data were provided in part by the Human Connectome Project, WU-Minn Consortium (Principal  
497 Investigators: David Van Essen and Kamil Ugurbil; 1U54MH091657) funded by the 16 NIH Institutes  
498 and Centers that support the NIH Blueprint for Neuroscience Research; and by the McDonnell Center  
499 for Systems Neuroscience at Washington University.

## 500 **References**

- 501 1. Reid LB, Sale M V, Cunnington R, Mattingley JB, Rose SE. Brain changes following four weeks  
502 of unimanual motor training: Evidence from fMRI-guided diffusion MRI tractography. *Hum*  
503 *Brain Mapp* [Internet]. 2017 Sep 5;38(9):4302–12. Available from:  
504 <http://www.ncbi.nlm.nih.gov/pubmed/28677154>
- 505 2. Reid LB, Rose SE, Boyd RN. Rehabilitation and neuroplasticity in children with unilateral  
506 cerebral palsy. *Nat Rev Neurol* [Internet]. 2015 Jul;11(7):390–400. Available from:  
507 <http://www.nature.com/doi/10.1038/nrneuro.2015.97>
- 508 3. Winston GP. Epilepsy surgery, vision, and driving: what has surgery taught us and could  
509 modern imaging reduce the risk of visual deficits? *Epilepsia* [Internet]. 2013  
510 Nov;54(11):1877–88. Available from: <http://www.ncbi.nlm.nih.gov/pubmed/24199825>
- 511 4. Martínez-Heras E, Varriano F, Prčkovska V, Laredo C, Andorrà M, Martínez-Lapiscina EH, et al.  
512 Improved Framework for Tractography Reconstruction of the Optic Radiation. *PLoS One*  
513 [Internet]. 2015;10(9):e0137064. Available from:  
514 <http://www.ncbi.nlm.nih.gov/pubmed/26376179>
- 515 5. Schumacher L V., Reisert M, Nitschke K, Egger K, Urbach H, Hennig J, et al. Probing the  
516 reproducibility of quantitative estimates of structural connectivity derived from global  
517 tractography. *Neuroimage* [Internet]. 2018;175(February):215–29. Available from:  
518 <https://doi.org/10.1016/j.neuroimage.2018.01.086>

- 519 6. Tong Q, He H, Gong T, Li C, Liang P, Qian T, et al. Reproducibility of multi-shell diffusion  
520 tractography on traveling subjects: A multicenter study prospective. *Magn Reson Imaging*  
521 [Internet]. 2019 Feb 21;59(February):1–9. Available from:  
522 <https://www.sciencedirect.com/science/article/pii/S0730725X18305228?via%3Dihub>
- 523 7. Roine T, Jeurissen B, Perrone D, Aelterman J, Philips W, Sijbers J, et al. Reproducibility and  
524 intercorrelation of graph theoretical measures in structural brain connectivity networks. *Med*  
525 *Image Anal* [Internet]. 2019;52:56–67. Available from:  
526 <https://doi.org/10.1016/j.media.2018.10.009>
- 527 8. Calamante F, Tournier J-D, Jackson GD, Connelly A. Track-density imaging (TDI): super-  
528 resolution white matter imaging using whole-brain track-density mapping. *Neuroimage*  
529 [Internet]. 2010 Dec;53(4):1233–43. Available from:  
530 <http://linkinghub.elsevier.com/retrieve/pii/S1053811910009766>
- 531 9. Lo Presti G, Carbone M, Ciriaci D, Aramini D, Ferrari M, Ferrari V. Assessment of DICOM  
532 Viewers Capable of Loading Patient-specific 3D Models Obtained by Different Segmentation  
533 Platforms in the Operating Room. *J Digit Imaging* [Internet]. 2015 Oct;28(5):518–27. Available  
534 from: <http://www.ncbi.nlm.nih.gov/pubmed/25739346>
- 535 10. Haak D, Page CE, Deserno TM. A Survey of DICOM Viewer Software to Integrate Clinical  
536 Research and Medical Imaging. *J Digit Imaging*. 2016;29(2):206–15.
- 537 11. Essayed WI, Zhang F, Unadkat P, Cosgrove GR, Golby AJ, O’Donnell LJ. White matter  
538 tractography for neurosurgical planning: A topography-based review of the current state of  
539 the art. *NeuroImage Clin* [Internet]. 2017;15(April):659–72. Available from:  
540 <http://dx.doi.org/10.1016/j.nicl.2017.06.011>
- 541 12. Reid LB, Sale M V., Cunnington R, Rose SE. Motor Learning Induced Neuroplasticity, Revealed  
542 By fMRI-Guided Diffusion Imaging. In: 24th Annual Meeting and Exhibition of the  
543 International Society for Magnetic Resonance in Medicine. Singapore: International Society  
544 for Developmental Neuroscience; 2016.
- 545 13. Casella G, Berger R. *Statistical inference*. 2nd ed. Duxbury: Duxbury Press International; 2001.
- 546 14. Rice JA. *Mathematical Statistics and Data Analysis*. Third. Duxbury: Belmont, CA: Duxbury  
547 Press; 2006.
- 548 15. Dice LR. Measures of the Amount of Ecologic Association Between Species. *Ecology*

- 549 [Internet]. 1945;26(3):297–302. Available from: <http://www.jstor.org/stable/1932409>
- 550 16. Van Essen DC, Ugurbil K, Auerbach E, Barch D, Behrens TEJ, Bucholz R, et al. The Human  
551 Connectome Project: a data acquisition perspective. *Neuroimage* [Internet]. 2012 Oct  
552 1;62(4):2222–31. Available from: <http://www.ncbi.nlm.nih.gov/pubmed/22366334>
- 553 17. Glasser MF, Sotiropoulos SN, Wilson JA, Coalson TS, Fischl B, Andersson JL, et al. The minimal  
554 preprocessing pipelines for the Human Connectome Project. *Neuroimage* [Internet]. 2013 Oct  
555 15;80:105–24. Available from: <http://dx.doi.org/10.1016/j.neuroimage.2013.04.127>
- 556 18. Tournier J-D, Smith RE, Raffelt DA, Tabbara R, Dhollander T, Pietsch M, et al. MRtrix3: A fast,  
557 flexible and open software framework for medical image processing and visualisation.  
558 *bioRxiv*. 2019;
- 559 19. Jeurissen B, Tournier J-D, Dhollander T, Connelly A, Sijbers J. Multi-tissue constrained  
560 spherical deconvolution for improved analysis of multi-shell diffusion MRI data. *Neuroimage*  
561 [Internet]. 2014 Dec;103:411–26. Available from:  
562 <http://dx.doi.org/10.1016/j.neuroimage.2014.07.061>
- 563 20. Dhollander T, Zanin J, Nayagam BA, Rance G, Connelly A. Feasibility and benefits of 3-tissue  
564 constrained spherical deconvolution for studying the brains of babies. In: Proceedings of the  
565 26th annual meeting of the International Society of Magnetic Resonance in Medicine. 2018.  
566 p. 3077.
- 567 21. Reid LB, Gillman A, Pagnozzi AM, Manjón J V., Frupp J. MRI Denoising and Artefact Removal  
568 Using Self-Organizing Maps for Fast Global Block-Matching. In: Bai W, Sanroma G, Wu G,  
569 Munsell BC, Zhan Y, Coupé P, editors. *Lecture Notes in Computer Science* [Internet]. 2018. p.  
570 20–7. Available from: <http://link.springer.com/10.1007/978-3-319-28194-0>
- 571 22. Avants BB, Epstein CL, Grossman M, Gee JC. Symmetric diffeomorphic image registration with  
572 cross-correlation: evaluating automated labeling of elderly and neurodegenerative brain.  
573 *Med Image Anal* [Internet]. 2008 Feb;12(1):26–41. Available from:  
574 <http://www.ncbi.nlm.nih.gov/pubmed/17659998>
- 575 23. Grabner G, Janke AL, Budge MM, Smith D, Pruessner J, Collins DL. Symmetric atlas and  
576 model based segmentation: an application to the hippocampus in older adults. *Med Image*  
577 *Comput Comput Assist Interv* [Internet]. 2006;9(Pt 2):58–66. Available from:  
578 [http://dx.doi.org/10.1007/11866565\\_113](http://dx.doi.org/10.1007/11866565_113)

- 579 24. Tournier J-D, Calamante F, Connelly A. Improved probabilistic streamlines tractography by  
580 2nd order integration over fibre orientation distributions. In: Proceedings of the International  
581 Society for Magnetic Resonance in Medicine. 2010. p. 1670.
- 582 25. Smith RE, Tournier J-D, Calamante F, Connelly A. SIFT: Spherical-deconvolution informed  
583 filtering of tractograms. *Neuroimage* [Internet]. 2013 Feb 15 [cited 2013 Aug 8];67:298–312.  
584 Available from: <http://www.ncbi.nlm.nih.gov/pubmed/23238430>
- 585 26. Smith RE, Tournier J-D, Calamante F, Connelly A. SIFT2: Enabling dense quantitative  
586 assessment of brain white matter connectivity using streamlines tractography. *Neuroimage*  
587 [Internet]. 2015 Oct 1;119:338–51. Available from:  
588 <http://linkinghub.elsevier.com/retrieve/pii/S1053811915005972>
- 589 27. Mesri HY, David S, Viergever MA, Leemans A. The adverse effect of gradient nonlinearities on  
590 diffusion MRI: From voxels to group studies. *Neuroimage* [Internet]. 2020 Jan;205(August  
591 2019):116127. Available from: <https://doi.org/10.1016/j.neuroimage.2019.116127>
- 592
